# Macro-to-Micro Structural Proteomics: Native Source Proteins for High-Throughput Crystallization

Monica Totir<sup>1</sup><sup>‡a</sup>, Nathaniel Echols<sup>1</sup><sup>‡b</sup>, Max Nanao<sup>2</sup>, Christine L. Gee<sup>1</sup><sup>‡c</sup>, Alisa Moskaleva<sup>1</sup><sup>‡d</sup>, Scott Gradia<sup>3</sup>, Anthony T. Iavarone<sup>3</sup>, James M. Berger<sup>1</sup>, Andrew P. May<sup>4</sup>, Chloe Zubieta<sup>1</sup><sup>\*‡e</sup>, Tom Alber<sup>1</sup><sup>\*</sup>

**1** Department of Molecular and Cell Biology, University of California, Berkeley, California, United States of America, **2** European Molecular Biology Laboratory, Grenoble, France, **3** QB3 Institute, Berkeley, California, United States of America, **4** Fluidigm Corporation, South San Francisco, California, United States of America

## Abstract

Structural biology and structural genomics projects routinely rely on recombinantly expressed proteins, but many proteins and complexes are difficult to obtain by this approach. We investigated native source proteins for high-throughput protein crystallography applications. The *Escherichia coli* proteome was fractionated, purified, crystallized, and structurally characterized. Macro-scale fermentation and fractionation were used to subdivide the soluble proteome into 408 unique fractions of which 295 fractions yielded crystals in microfluidic crystallization chips. Of the 295 crystals, 152 were selected for optimization, diffraction screening, and data collection. Twenty-three structures were determined, four of which were novel. This study demonstrates the utility of native source proteins for high-throughput crystallography.

**Citation:** Totir M, Echols N, Nanao M, Gee CL, Moskaleva A, et al. (2012) Macro-to-Micro Structural Proteomics: Native Source Proteins for High-Throughput Crystallization. PLoS ONE 7(2): e32498. doi:10.1371/journal.pone.0032498

**Editor:** Jörg Langowski, German Cancer Research Center, Germany

**Received:** October 26, 2011; **Accepted:** January 27, 2012; **Published:** February 29, 2012

**Copyright:** © 2012 Totir et al. This is an open-access article distributed under the terms of the Creative Commons Attribution License, which permits unrestricted use, distribution, and reproduction in any medium, provided the original author and source are credited.

**Funding:** This work was supported by the University of California Office of the President UC Discovery Grant matched by the Fluidigm Corporation (bio06583; T.A.), a grant from the W. M. Keck Foundation (T.A. and J.M.B.) and National Institutes of Health (NIH) P01AI068135 (T.A. and J.M.B.). The Advanced Light Source is supported by the Director, Office of Science, Office of Basic Energy Sciences, Materials Sciences Division, of the US Department of Energy (DOE) under Contract No. DE-AC03-76SF00098 at Lawrence Berkeley National Laboratory. The funders had no role in study design, data collection and analysis, decision to publish, or preparation of the manuscript.

**Competing Interests:** The authors have read the journal's policy and have the following conflicts. Dr. May is employed by Fluidigm Corporation and provided microfluidic chips and access to equipment for the visualization of the crystallized samples. This does not alter the authors' adherence to all the PLoS ONE policies on sharing data and materials.

\* E-mail: zubieta@esrf.fr (CZ); tom@ucxray.berkeley.edu (TA)

‡ These authors contributed equally to this work.

‡a Current address: Regensburg, Germany

‡b Current address: Physical Biosciences Division, Lawrence Berkeley National Laboratory, Berkeley, California, United States of America

‡c Current address: Australian Synchrotron, Clayton, Victoria, Australia

‡d Current address: Department of Chemical and Systems Biology, Stanford University School of Medicine, Stanford, California, United States of America

‡e Current address: European Synchrotron Radiation Facility, BP 181, Grenoble, France

## Introduction

Since the advent of recombinant DNA technology, structural and biochemical research has focused increasingly on the characterization of recombinantly expressed prokaryotic and eukaryotic proteins. However, statistics from the National Institutes of Health Protein Structure Initiative (PSI) (<http://targetdb.pdb.org/statistics/TargetStatistics.html>) indicate that of successfully clones and expressed proteins, less than 5% of the targets selected result in a crystal structure. Protein production, purification, and crystallization remain a series of bottlenecks for large scale structural studies of any given genome [1]. These results suggest that new approaches are warranted in order to access the great majority of proteins and protein complexes that cannot be facily recombinantly expressed for structural and biochemical analysis.

To fill this gap, we investigated the feasibility of native-source protein purification as part of a high-throughput crystallization and structure determination pipeline. The methodologies described provide a complementary approach to current structural genomics initiatives. By providing an alternative to recombinant technology for protein production, the native source purification

and crystallization pipeline outlined here can potentially expand the scope of structural studies to proteins that currently cannot be obtained or are difficult to obtain by recombinant DNA techniques due to low levels of expression, poor solubility, the lack of necessary post-translational modifications, or instability due to missing partners in the native protein complex. Based on these experiments, we demonstrate successful structural characterization of multiple proteins using only microgram quantities of purified material. By scaling up the amount of starting material and introducing atypical methods of filtration and fractionation, we obtained sufficient quantities of 408 unique samples for crystallization trials. Simultaneously, scaling down the amount of protein sample used for crystallization, enabled structure determination of protein species from native sources.

## Results

*Escherichia coli* was chosen as a model system in this study due to its relatively small and structurally well-studied proteome and fully-sequenced genome [2,3]. Of the ~4243 predicted ORFs in the *E. coli* proteome, over a quarter are likely to encode membrane associated or membrane bound proteins. This study focused on

the soluble portion of the proteome. In a typical experiment, large-scale fermentation (120 L) was used to provide sufficient starting material for downstream purification and crystallization. To maximize access to soluble proteins, we grew the cells aerobically to log phase at 37°C in minimal media. Large scale fermentation allowed the production of kilogram quantities of cells, while minimizing the deleterious effect of high cell density on protein quality. Automated fermentation was necessary to monitor the growth conditions, maintain appropriate aeration, control pH, and to produce enough starting material for downstream crystallization experiments [4].

Purification of proteins from a native source presented very different challenges compared to recombinantly overexpressed and affinity tagged proteins. To successfully purify unique protein samples from the native proteome, a series of orthogonal steps were used (Figure 1). Initial fractionation steps relied on rapid tangential flow methods and pilot-scale ion exchange chromatography using new high-capacity resins to process large amounts of *E. coli* lysate (0.5–1 kg cells). Based on size predictions of all predicted ORFs present in *E. coli*, a large peak at approximately 20 kDa was expected from initial profiling of the proteome (Figure 2A). The soluble proteins, however, had large peaks at void volume (over 500 kDa) and approximately 100 kDa (Figure 2B), suggesting that many proteins were either aggregated or forming large multimeric complexes. In order to separate these two peaks, an initial step of tangential flow filtration was used to allow the rapid generation of a rough cut between a high molecular weight fraction (over 500 kDa), and a lower molecular weight fraction. While the higher molecular weight fraction likely contained aggregates, organelles, and soluble protein complexes, this fraction was not extensively pursued. Further fractionation using sucrose gradients was attempted; however no crystals were obtained from the high molecular weight fraction leading us to focus on the fraction under 500 kDa.

The <500 kDa fraction was further purified through a series of orthogonal steps including the first ion exchange step on pilot-scale columns with step elution at salt concentrations ranging from 0.01 to 1 M. Ion exchange allowed the selection of different pools of proteins based on the isoelectric point (pI) and enabled initial proteome simplification to create reproducible and manageable subsets of proteins. The proteome subsets were subjected to a series of downstream purifications including affinity purification, hydrophobic interaction chromatography, gel exclusion, and high-resolution ion exchange chromatography. Final fraction purity ranged from approximately 95% to less than 5%, with the majority of fractions comprising at least 30% of one protein species (Figure 2C). By fractionating the soluble portion of the proteome and retaining all fractions for further subdivision in sequential steps, the number of unique samples for downstream crystallization was maximized from a single preparation of bacterial cells. In addition, as the number of fractions increased exponentially during purification, fractions were frozen to facilitate handling and processing. By retaining all fractions during purification, the number of fractions processed to final purity could be easily scaled depending on available time and personnel. The large scale production and purification of proteins from the soluble *E. coli* proteome constituted a macro scale step in the crystallization pipeline. To our knowledge, this represents the first use of pilot systems for whole-proteome fractionation and subsequent crystallization. The proteins produced from this step were then subjected to microscale characterization and crystallization using microfluidic technology.

To maximize the number of protein crystal structures solved, the crystallization platform needed to effectively use the small

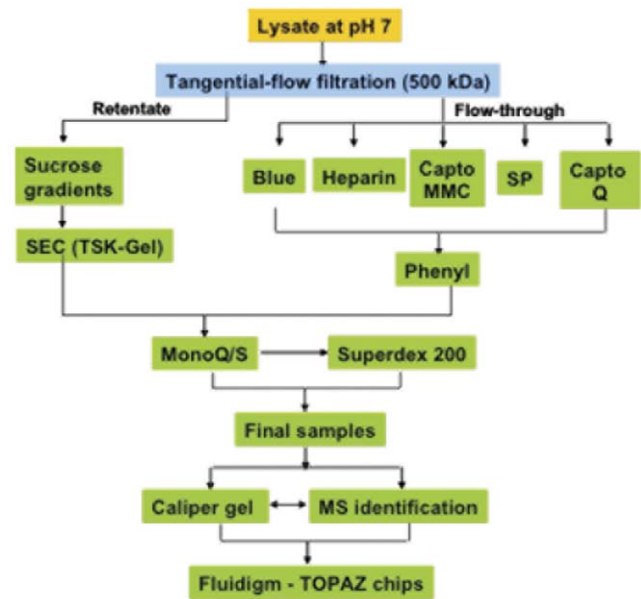

**Figure 1. Proteome fractionation and purification flow chart.**

Approximately 500 g of *E. coli* cells were lysed at pH 7 using a microfluidizer and the cell debris pelleted. The supernatant was applied to a tangential flow column with a nominal molecular weight cut off of 500 kDa, generating 2 fractions (retentate and flow through). The fraction above 500 kDa (retentate) was further purified via sucrose gradients, size exclusion, and ion exchange chromatography prior to crystallization trials. The fraction less than 500 kDa was applied to multiple affinity and ion exchange columns followed by phenyl sepharose, ion exchange, and size exclusion prior to crystallization trials in microfluidic chips.

doi:10.1371/journal.pone.0032498.g001

amounts of available samples from native purification. Microfluidic crystallization allowed routine sampling of 96 conditions with as little as 10 µg of protein [5,6,7]. Scaling up protein production and purification yielded enough material for thousands of individual crystallization trials, even for samples present in relatively low abundance (less than 100 µg of purified protein). Thus, even a small amount of sample was sufficient in many cases to screen and optimize crystals for X-ray structure determination at a synchrotron source.

The proteome fractionation step in the pipeline yielded 408 unique fractions, as identified by capillary electrophoresis, containing one or more proteins (Figure 3A). All these fractions were used in crystallization trials in microfluidic chips. Surprisingly, sample complexity did not correlate with crystallization hits or crystal quality (Figure 3B and C). We obtained crystals in 295 of the 408 fractions, representing 73% of the total fractions obtained. Out of these, we focused on 152 of the higher quality crystals, where crystal quality was scored based on size and morphology. Of the fractions that were selected for crystal optimization and data collection, 37 unique datasets were collected at synchrotron beamlines, with a maximum resolution ranging from 1.8 Å to 7 Å. Twenty eight of the 37 datasets had a resolution better than 3.5 Å.

Protein identification was done after successful crystallization and x-ray data collection. Due to limited available sample and the high complexity of many of the crystallized fractions, mass spectrometry was only successful in identifying approximately 20% of the crystallized proteins. Brute force molecular replacement trials were used to identify proteins in the majority of the crystallized and well diffracting samples. In ~80% of the cases tested here, where the resolution was 3.5 Å or better, this strategy

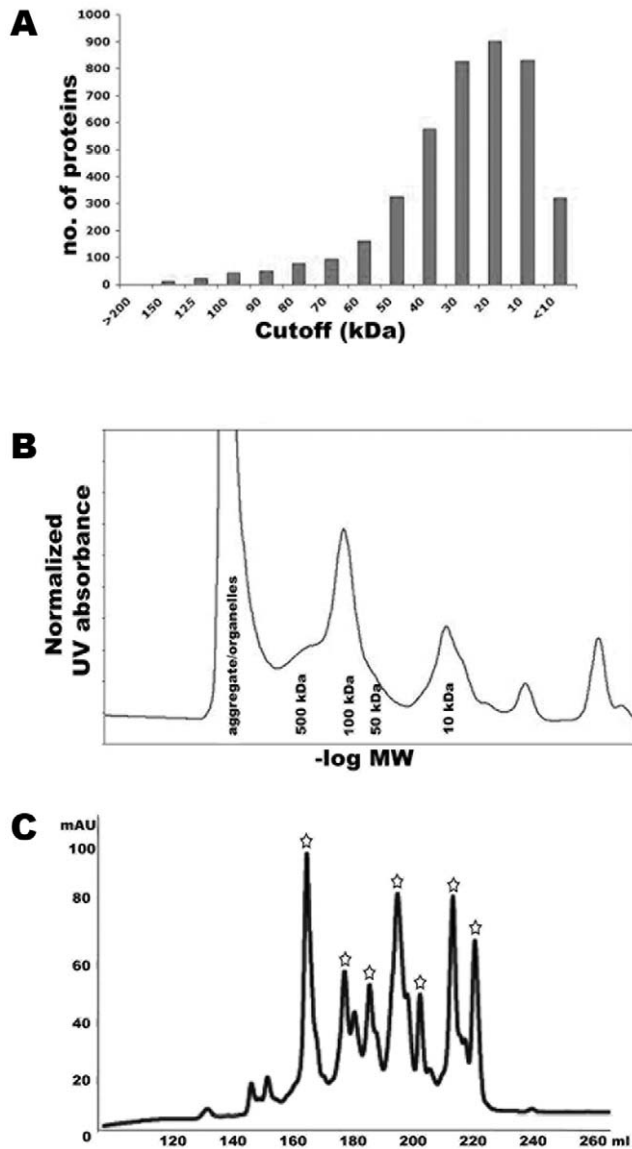

**Figure 2. *E. coli* proteome predicted and experimental characterization.** (A) Predicted size distribution of all ORFs in the *E. coli* proteome. (B) Size exclusion chromatograph of crude *E. coli* lysate with the largest peak at approximately 100 kDa. (C) Final step ion exchange (MonoQ) purification in a typical fractionation experiment. Peaks marked with a star were sent for downstream crystallization trials. doi:10.1371/journal.pone.0032498.g002

was successful in identifying the protein and solving the crystal structure (Table 1). Brute-force molecular replacement trials were conducted using 10,747 structures in the PDB with at least 30% sequence identity to an *E. coli* ORF. Each data set collected was screened against all search models using the program MOLREP [8]. Rotation function Z-scores were calculated and an arbitrary cut-off between 6 to 7 was used to determine whether a potentially correct solution had been found prior to a full translational search using MOLREP and/or PHASER [9]. For all structures solved, visual inspection of the electron density map was sufficient to unambiguously determine whether or not the solution was correct. Only novel structures not present in the PDB were further refined.

In all, we determined 23 structures (Figure 4 and Table 1), four of them not deposited in the protein data bank. These novel

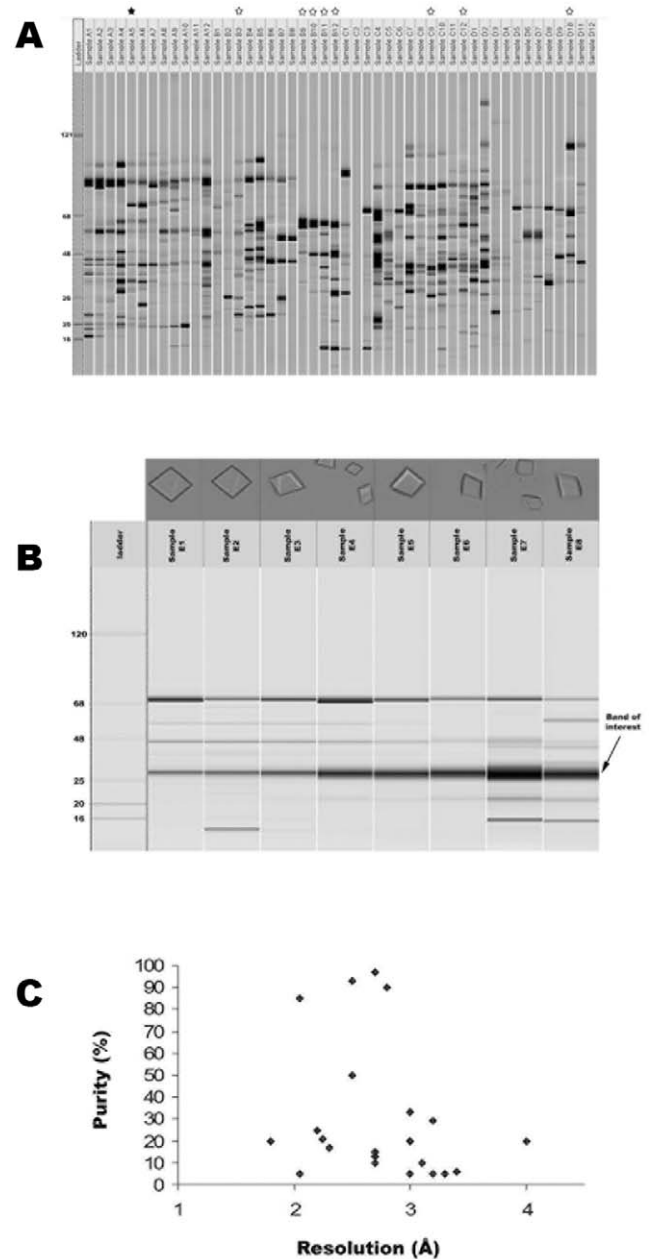

**Figure 3. Crystallization of native source *E. coli* proteins.** (A) Capillary electrophoresis of purified protein fractions. White stars indicate samples successfully crystallized and black stars represent solved structures. (B) Crystals of 5-keto-4-deoxyuronate isomerase crystallized from fractions of varying purity. Crystal quality was not always correlated with sample purity. (C) Resolution of the data collected versus percent purity of the starting sample based on quantification of protein concentrations by capillary gel electrophoresis with the Caliper system. Sample purity did not correlate with higher resolution data. doi:10.1371/journal.pone.0032498.g003

structures represent enzymes involved in stress response, specifically methylglyoxal reductase (YghZ) (Table 2 and Figure 5), as well as three enzymes important in core metabolic functions, phosphoglucose isomerase (pGI) (Table 3 and Figure 6), 6-phospho-beta-glucosidase (BglA) (Table 4 and Figure 7), and glutamate dehydrogenase (GDH) (Table 5 and Figure 8). All the proteins are oligomeric (YghZ, pGI, BglA, GDH) and belong to

**Table 1.** Crystallization conditions and data collection statistics for previously deposited structures.

| PDB ID | Resolution this study | Resolution PDB | Rsym  | I/sigI | R-free | Crystallization conditions                                                                  | Protein description                               |
|--------|-----------------------|----------------|-------|--------|--------|---------------------------------------------------------------------------------------------|---------------------------------------------------|
| 1IPW   | 3.2                   | 2.3            | 0.179 | 3.6    | 0.41   | 15–20% PEG 1000, 100 mM MES pH 6.0, 300–400 mM KOAc                                         | Inorganic pyrophosphatase                         |
| 1XRU   | 3.0                   | 1.94           | 0.065 | 10.1   | 0.31   | 1.5 M Ammonium sulfate, 0.1 M MES, pH 6.5                                                   | 5-keto-4-deoxyuronate isomerase                   |
| 1N57   | 2.8                   | 1.6            | 0.122 | 15.5   | 0.27   | 0.1 M MgCl <sub>2</sub> , 0.1 M Tris pH 8.5, 20% PEG 10,000, 0.5% ethyl acetate             | Hsp31                                             |
| 1R2K   | 2.0                   | 2.1            | 0.054 | 17.4   | 0.29   | 1.4 M sodium citrate tribasic dihydrate, 0.1 M Hepes, pH 7.5                                | MoaB (molybdopterin biosynthesis protein B)       |
| 1BJN   | 2.2                   | 2.3            | 0.052 | 20.0   | 0.29   | 0.2 M MgCl <sub>2</sub> , 0.1 M HEPES pH 7.5, 15% PEG 3350                                  | phosphoserine aminotransferase                    |
| 1GG9   | 2.5                   | 1.89           | 0.126 | 7.2    | 0.28   | 200 mM NaCl, 100 mM Tris pH 8.5, 20% PEG 3350                                               | Catalase HPII                                     |
| 1PKY   | 3.2                   | 2.5            | 0.08  | 20.5   | 0.34   | 0.05 M Ammonium sulfate, 0.05 M Bis-Tris, pH 6.5, 30% pentaerythritol ethoxylate            | Pyruvate kinase I                                 |
| 1CS1   | 3.25                  | 1.5            | 0.109 | 5.7    | 0.36   | 45% polypropylene glycol 400, 0.1 M Bis-Tris, pH 6.5                                        | Cystathione gamma-synthase                        |
| 1TJ7   | 3.0                   | 2.44           | 0.166 | 21.6   | 0.29   | 0.1 M Bis-Tris pH 6.5, 1.6 to 0.8 M Ammonium sulfate.                                       | Arginosuccinate lyase                             |
| 1BBW   | 3.4                   | 2.7            | 0.142 | 9.4    | 0.35   | 0.1 M Tris pH 8.5, 25% PEG 3350, 3% isopropanol                                             | Lysyl-tRNA synthetase (constitutive)              |
| 1NXG   | 3.3                   | 2.5            | 0.077 | 8.4    | 0.32   | 0.2 M Lithium sulfate monohydrate, 25% PEG 3350, 0.1 M Tris, pH 8.5                         | Citrate synthase                                  |
| 1DHP   | 3.0                   | 2.3            | 0.182 | 5.6    | 0.29   | 0.1 M HEPES pH 7.5, 10–25% PEG 3350                                                         | Dihydrodipicolinate synthase                      |
| 1YAC   | 2.3                   | 1.8            | 0.106 | 6.8    | 0.25   | 0.1 M Bis-Tris pH 6.5, 45% Polypropylene glycol P 400                                       | ycaC gene product                                 |
| 1x12   | 4.0                   | 2.0            | 0.129 | 5.3    | 0.42   | 0.2 M NaFormate, 20% PEG 3350, 3% MeOH                                                      | Nicotinamide nucleotide transhydrogenase domain I |
| 1YE9   | 2.5                   | 2.8            | 0.174 | 11.4   | 0.33   | 0.1 M MgFormate, 18% PEG 3350                                                               | Catalase HPII (truncated)                         |
| 1HOT   | 2.2                   | 2.4            | 0.134 | 16     | 0.34   | 0.056 M sodium phosphate monobasic monohydrate, 1.344 M potassium phosphate dibasic, pH 8.2 | Glucosamine 6-phosphate deaminase                 |
| 1CG1   | 2.7                   | 2.5            | 0.051 | 26.6   | 0.35   | 0.1 M TRIS pH 8.5, 25% PEG 3350                                                             | Adenylosuccinate synthetase                       |
| 2PWZ   | 1.6                   | 2.2            | 0.07  | 27     | 0.42   | 1.1 M Sodium malonate in 0.1 M HEPES pH 7, 0.5% Jeffamine ED-2001                           | Malate dehydrogenase                              |
| 1PMO   | 2.0                   | 2.3            | 0.087 | 11.9   | 0.32   | 0.2 M Ammonium citrate tribasic pH 7, 20% PEG3350                                           | Glutamate decarboxylase                           |

doi:10.1371/journal.pone.0032498.t001

three different fold families. YghZ and BglA have a classic TIM barrel structure, pGI adopts an alpha/beta fold, and GDH possesses a core Rossmann fold found in many nucleotide binding proteins. The percent identity of these four novel structures compared to deposited structures ranged from 33% (YghZ) to 65% (pGI).

### Methylglyoxal reductase (YghZ)

The aldo-ketoreductases, of which YghZ is a member, are a large family of NADPH-dependent oxidoreductases that have the function of reducing various aldehydes and ketones [10]. The YghZ enzyme likely functions as a methylglyoxal reductase and is

known to convert the toxic metabolite methylglyoxal to acetol *in vitro* and *in vivo*. As in the larger family of aldo-keto reductases, YghZ, has a central TIM barrel domain and a smaller, mostly helical domain. YghZ is a distant homolog (<40% sequence identity) of mammalian aflatoxin dialdehyde reductases of the aldo-keto reductase AKR7 family and to potassium channel  $\beta$ -subunits in the AKR6 family [11,12], the structure of which was used for molecular replacement. The structure of YghZ reveals the protein forms a stable tetramer based on structural homology to related proteins in the PDB (3ERP) and the amount of buried surface area of the tetramer interface [13] (Figure 5). Based on sequence alignments and structural alignments with other aldo-keto reductases, likely catalytic residues were

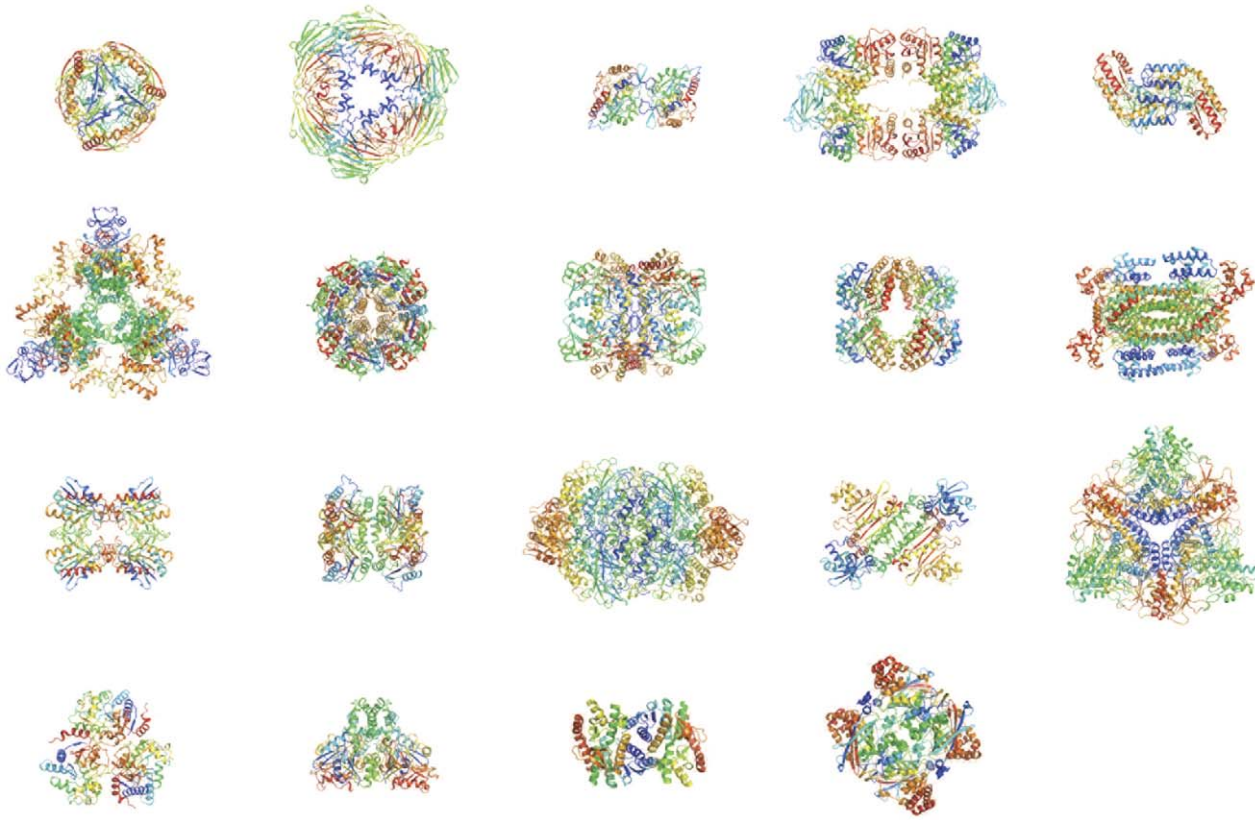

**Figure 4. Structures of previously deposited proteins solved during the pipeline.** All proteins were oligomers as shown above. Proteins are from top left - inorganic pyrophosphatase (1IPW), 5-keto-4-deoxyuronate isomerase (1XRU), Hsp31 (1N57), pyruvate kinase (1PKY), phosphoserine aminotransferase (1BJN), Citrate synthase (1NXG), ycaC gene product (1YAC), Cystathione gamma-synthase (1CS1), Dihydrodipicolinate synthase (1DHP), Arginosuccinate lyase (1TJ7), Nicotinamide nucleotide transhydrogenase domain I (1×12), MoaB (molybdopterin biosynthesis protein B) (1R2K), Catalase HP11 (1GG9), Lysyl-tRNA synthetase (constitutive) (1BBW), Glutamate decarboxylase (1PMO), Glucosamine 6-phosphate deaminase (IHOT), Malate dehydrogenase (2PWZ), Adenylosuccinate synthetase (1CG1), catalase HP11 truncated (1YE9).  
doi:10.1371/journal.pone.0032498.g004

identified in our study. Four amino acids (Tyr-66, His-138, Lys-97 and Asp-61) form a putative catalytic tetrad in the active site. Although some extra electron density was noted in the active site, the density was too diffuse to reliably model the dinucleotide cofactor or substrate/product molecules.

#### Glucose-6-phosphate isomerase (pGI)

Glucose-6-phosphate isomerase (pGI) catalyzes the reversible isomerization of D-glucose-6-phosphate to D-fructose-6-phosphate in glycolysis and gluconeogenesis, and facilitates the recycling of hexose-6-phosphate in the pentose phosphate pathway [14,15]. The protein has an alpha/beta fold with an extensive dimer interface. The active site, identified based on sequence and structural alignments with related proteins, is formed at the dimer interface and comprises residues Arg270, Glu355 and His386, with the active site histidine donated from the partner monomer (Figure 6). The catalytic mechanism is an acid-base type mechanism with Glu355 acting as a putative general base, abstracting a proton from the substrate to facilitate the reversible isomerization of the substrate molecule. Histidine 386 donates a proton, facilitating the ring opening mechanism. As expected from the high sequence identity (over 60% identical), the *E. coli* pGI dimer aligns extremely well with the mammalian enzyme structures used for molecular replacement [15].

#### 6-phospho-beta-glucosidase (BglA)

6-phospho-beta-glucosidase (BglA), is a cytoplasmic enzyme and part of the glycosyl hydrolase family that is able to hydrolyse aromatic  $\beta$ -glucoside phosphates into glucose-6-phosphate and a hydroxyl aromatic *in vitro*. *E. coli* has several predicted enzymes in this family, whose physiological role has not been fully described. BglA forms an 8-strand alpha/beta TIM barrel with the putative catalytic residues Glu180 and Glu377 located in beta strands 4 and 7. Additional density was noted in the active site and a sulfate molecule from the crystallization conditions was well ordered adjacent to the putative catalytic residues Glu180 and Glu377 and formed hydrogen bonding interactions with Thr434 and Trp425. Modeling glucose-6-phosphate into the active site based on the position of the sulfate molecule revealed residues likely involved in substrate positioning (Figure 7).

#### Glutamate dehydrogenase

Glutamate dehydrogenase (GDH), catalyzes the reversible oxidative deamination of glutamate to  $\alpha$ -ketoglutarate and ammonia, using either NAD<sup>+</sup> or NADP<sup>+</sup> as a cofactor. The reverse reaction generates glutamate and the reduced cofactor NADH or NADPH, thus GDH has a pivotal role between carbon and nitrogen metabolism, particularly in plants and bacteria. The majority of characterized glutamate dehydrogenases are homo-

**Table 2.** Data collection and refinement statistics for methylglyoxal reductase (YghZ).

| YghZ                               |                     |
|------------------------------------|---------------------|
| <b>Data collection</b>             |                     |
| Space group                        | P1                  |
| Cell dimensions                    |                     |
| <i>a</i> , <i>b</i> , <i>c</i> (Å) | 91.70, 98.06, 98.26 |
| $\alpha$ , $\beta$ , $\gamma$ (°)  | 90.3, 93.0, 106.1   |
| Resolution (Å)                     | 98–1.8 (1.87–1.8)   |
| $R_{\text{sym}}$                   | 0.06(0.56)          |
| $I/\sigma I$                       | 9.4(1.6)            |
| Completeness (%)                   | 96.2 (93.3)         |
| Redundancy                         | 3.9(3.9)            |
| <b>Refinement</b>                  |                     |
| Resolution (Å)                     | 94–1.8              |
| No. reflections                    | 277925              |
| $R_{\text{work}}/R_{\text{free}}$  | 17.1/20.8           |
| No. atoms                          |                     |
| Protein                            | 39762               |
| Ligand/ion                         | 9                   |
| Water                              | 2644                |
| <b>B-factors</b>                   |                     |
| Protein                            | 28.0                |
| Ligand/ion                         | 20.0                |
| Water                              | 40.2                |
| <b>R.m.s. deviations</b>           |                     |
| Bond lengths (Å)                   | 0.019               |
| Bond angles (°)                    | 1.534               |

\*Values in parentheses are for highest-resolution shell.  
doi:10.1371/journal.pone.0032498.t002

oligomers, consisting of between two to six subunits, with dimers being the most frequent [16]. GDH from *E. coli* crystallized as a hexamer, consistent with biochemical observations [17], and contains two domains – a larger C-terminal Rossmann fold containing domain and a second N-terminal helical capping domain (Figure 8). The putative active site is located in a cleft between the two domains.

## Discussion

Current estimates suggest that *E. coli* cells produce over 1100 cytosolic soluble proteins that vary in abundance up to 5 logs [18]. Many of these proteins are expected to form macromolecular complexes, reducing the number of molecular species to less than 1000 [19,20]. Our aim was to fractionate the crude lysate in several distinct ways in order to obtain as many of these species as possible in relatively pure fractions. Using a “macro-to-micro” approach that combined macro scale methods for the production and purification of native source proteins with novel microfluidic methods for protein sample analysis and crystallization, we were able to expand previous work that focused on proteome fractionation alone and to develop a robust structure determination pipeline using native source proteins.

Previous studies have shown that the soluble proteins of the *E. coli* proteome can be fractionated using ion exchange chromatog-

raphy and unique proteins identified by mass spectrometry from 2-D gel spots [21]. Based on these studies that successfully simplified and fractionated the soluble portion of the proteome, we were able to scale-up these purification steps in order to obtain enough material for downstream crystallization experiments. The powerful combination of multiple chromatographic methods (tangential flow fractionation, ion exchange chromatography on high capacity resins, size exclusion chromatography, pH shifts, affinity chromatography, and limited proteolysis) to subdivide the *E. coli* proteome allowed the generation of unique protein samples for downstream crystallization and structure determination.

While in many cases lower purity samples may require further purification steps in order to be suitable for downstream crystallization experiments, it was observed that some proteins present in as little as 5% abundance still crystallized and yielded crystals of sufficient quality for structure determination (Figure 3 B and C). Thus, in contrast to the classical biochemistry approach where the final objective is to achieve a highly pure sample by removing trace impurities prior to crystallization, we found that many well diffracting crystals could be obtained from fairly complex samples. This successful crystallization from complex samples is most probably due to the inherent propensity of certain proteins to crystallize and will not be true in all cases. As this study sampled a broad swathe of the *E. coli* proteome, our results are likely biased towards proteins with a high degree of crystallizability.

Size-exclusion chromatographic characterization of the lower molecular weight protein fraction (less than 500 kDa) showed a maximum peak at approximately 100 kDa, while analysis of the ORF content of *E. coli* suggests a proteome size distribution peak at approximately 20 kDa (Figure 2 A and B). One possible reason for the size difference observed is the presence of a large number of homo- and hetero-oligomers in the *E. coli* proteome. Studies of *E. coli* proteins and protein complexes demonstrated similar results, with the majority of proteins existing in complexes of varying stability [20]. In addition, all proteins crystallized were oligomeric. Oligomer formation has been postulated to increase the stability of a given protein species [22]. This likely selects for proteins that are highly stable and potentially more crystallizable [23].

Intracellular protein quantification studies of *E. coli* have shown that essential proteins are present with at least ten copies per cell and are present in higher concentrations than many non-essential proteins under steady state growth conditions [24]. We expected to see an over representation of high abundance and/or essential proteins in our crystallization experiments. Single cell protein concentration data were available for 14 of the 23 structures solved, and of these, only inorganic pyrophosphatase is an essential protein in *E. coli*. Nine of the non-essential proteins were high abundance (more than 10 copies per cell), while four of the remaining proteins had copy numbers ranging from 0.152 (pyruvate kinase I) to 2.6 (lysyl-tRNA synthetase) and are considered low abundance proteins. Thus, the structures determined did not sample only highly abundant proteins and/or essential proteins, but also sampled low abundance non-essential proteins. In addition, proteins involved in stress response such as methylglyoxal reductase (YghZ) and heat shock protein 31 (HSP31) [25] were crystallized. While these proteins are likely constitutively present at low levels under optimum growth conditions, the high cell density present during fermentor growth may lead to the induction of a stress response even when controlling for pH and aeration of the fermentor media. These results suggest a generally applicable method for altering the proteomic profile of a bacterial culture by manipulating the growth conditions to favor the production of proteins involved in

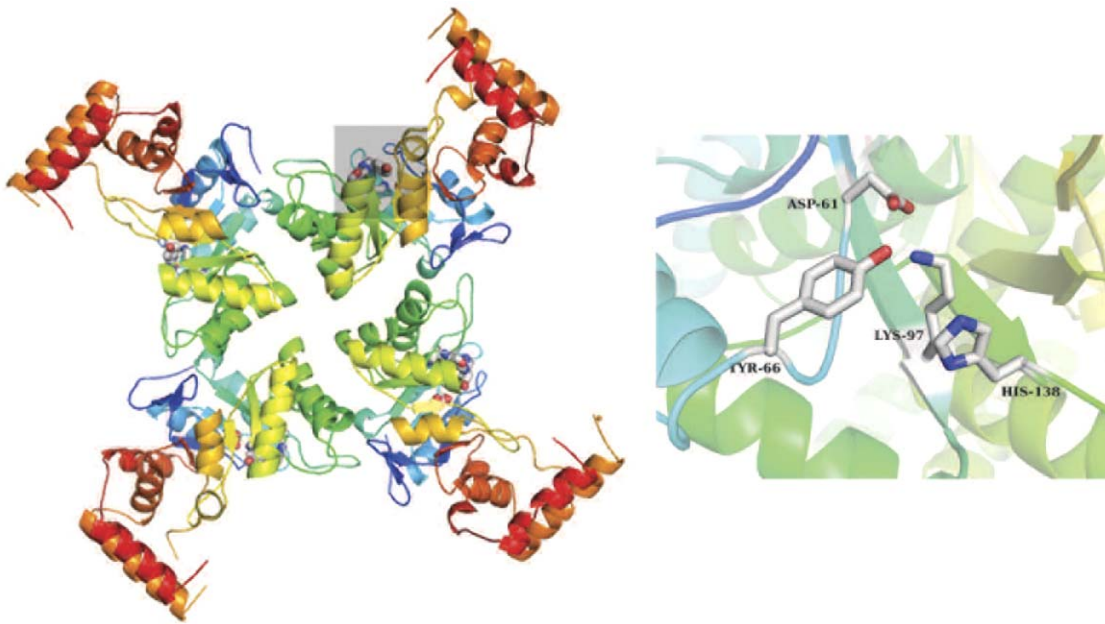

**Figure 5. YghZ tetramer and active site.** Left, the YghZ tetramer viewed along the four-fold axis. Putative active site residues are depicted as ball-and-stick and colored by atom with the active site of one monomer outlined by a gray box. Right, close -up view of the active site with putative active site residues colored by atom and labeled.  
doi:10.1371/journal.pone.0032498.g005

specific pathways such as stress response. By boosting the protein concentration of specific proteins, the likelihood of their subsequent purification and crystallization can be increased.

A non-trivial issue was the identification of the proteins upon successful crystallization. The small quantities of available sample coupled with the relative complexity of the fractions made protein identification by mass spectrometry difficult. Studies using samples obtained from capillary gel electrophoresis couple with time of flight mass spectrometry have been shown to give good results with picogram quantities of material [26,27]. It is likely that optimization of the mass spectrometric parameters and the use of equipment devoted to the identification of small amount of protein samples purified via capillary gel electrophoresis would greatly improve the success rate of mass spectrometry for routine protein identification. For this study, brute force molecular replacement provided a more robust method for the routine identification of crystallized protein samples, with a success rate of ~80% for well diffracting (better than 3.5 Å) crystals.

Brute force molecular replacement (MR) was used to both identify the crystallized proteins and address the fundamental problem of phasing the crystallographic data. Native data does not allow the *ab initio* structure determination and either MR search models, heavy atom derivatives, or, in more limited cases, changes due to radiation damage, are needed to successful phase a structure. In the case of inorganic pyrophosphatase, for example, the crystals were isomorphous to published structures in the Protein Data Bank (PDB) and hence a strong candidate was identified based on the cell constants and symmetry information alone. For the majority of the crystal structures, cell constants were not sufficient to identify the protein, leading to the use of brute force MR trials. The relatively simple MR protocol used in this study was designed to run on limited computational resources (typically 1 week on a single-processor system), which reduces the search space and sensitivity. Recent advances in the application of structure prediction methods [28,29,30,31] and assembly of helical fragments [32] have expanded the range of structures accessible by

MR to the point where it resembles true *ab initio* phasing, at the cost of massive computational overhead [33]. However, the ongoing evolution of multiprocessor systems, and the availability of massively parallel computing “grids” [34], will make these technologies more accessible to the average laboratory.

The twenty-three structures determined here represent a significant fraction of the 767 unique structures deposited in the PDB for *E. coli*, one of the most structurally studied model organisms. Because the PDB contains over 75,000 structures and an increasing amount of “fold space” is being sampled due in large part to the efforts of the structural genomics consortia [35], brute force molecular replacement is fast becoming an increasingly viable method for structure solution [34,36,37]. However, MR was not sufficient to determine six structures for which we collected native data of resolution better than 3.5 Å. Although our sample size is small, our 40% success rate (4 solved/10 collected of resolution better than 3.5 Å) with novel structures using MR suggests that significantly more structures would need to be solved to completely access the meta-proteome using MR strategies alone.

In addition to MR, attempts were made at heavy atom derivatization using mercury, NaBr and NaI soaks as well as phasing using the sulphur edge. While these approaches were successful on test crystals, we were not able to obtain useful phase information for the remaining unsolved data sets. Heavy atom derivatization often requires extensive optimization of soaking conditions through trial and error and thus a large number of crystals. As we were limited in the number of crystals available and the amount of sample for crystal optimization, this approach was not successful. Generally our crystals were small and suffered from radiation damage after collection of a complete dataset. The highly redundant data necessary for sulphur SAD phasing was not obtainable for the unsolved data sets. However, optimization of data collection parameters such as wavelength and exposure times would likely improve the success rate of sulphur SAD. Radiation induced phasing (RIP) [38,39] was not attempted in the current

**Table 3.** Data collection and refinement statistics for Glucose-6-phosphate isomerase (pGI).

|                                    | pGI                 |
|------------------------------------|---------------------|
| <b>Data collection</b>             |                     |
| Space group                        | P1                  |
| Cell dimensions                    |                     |
| <i>a</i> , <i>b</i> , <i>c</i> (Å) | 69.8, 72.9, 181.9   |
| $\alpha$ , $\beta$ , $\gamma$ (°)  | 92.5, 97.8, 114.6   |
| Resolution (Å)                     | 179–2.05 (2.1–2.05) |
| $R_{\text{sym}}$                   | 0.097(0.34)         |
| <i>I</i> / $\sigma$ <i>I</i>       | 7.3 (1.2)           |
| Completeness (%)                   | 95.0 (95.0)         |
| Redundancy                         | 2.0(2.1)            |
| <b>Refinement</b>                  |                     |
| Resolution (Å)                     | 89–2.05             |
| No. reflections                    | 186581              |
| $R_{\text{work}}/R_{\text{free}}$  | 17.2/23.0           |
| No. atoms                          |                     |
| Protein                            | 25984               |
| Ligand/ion                         | 1                   |
| Water                              | 3262                |
| $B$ -factors                       |                     |
| Protein                            | 23.1                |
| Ligand/ion                         | 27.5                |
| Water                              | 30.3                |
| R.m.s. deviations                  |                     |
| Bond lengths (Å)                   | 0.011               |
| Bond angles (°)                    | 1.300               |

\*Values in parentheses are for highest-resolution shell.  
doi:10.1371/journal.pone.0032498.t003

study but is another alternative method to use in order to solve the phase problem. For bacterial targets such as *E. coli*, selenomethionine incorporation provides an alternative to traditional heavy atom derivitization and works routinely for recombinantly expressed proteins. A drawback to this approach is the toxicity

and cost of selenomethionine. An estimated 500 g of *E. coli* grown in a 120 L fermentor would require at least twelve grams of L-selenomethionine, a substantial cost and disposal issue. However, for some bacterial targets this may provide an attractive alternative to relying on MR solutions or heavy atom soaking.

These studies comprise a first attempt to explore the feasibility and potential of using a macro-to-micro approach to fractionate and purify proteins exclusively from a native source for high-throughput crystallization and structure determination. As the scope of this pilot study is relatively small, the aim was to test an initial production pipeline using the model organism, *E. coli*. The success and efficacy of our native-source purification and crystallization were assessed by comparing the number of datasets collected compared with the number of available structures in the PDB and also the number of unknown protein structures identified and solved using native-source purification. The general utility of this approach is not limited to bacteria, but can be easily adapted to structurally study the proteomes of higher organisms or proteomes of specific tissues during different developmental stages, provided that a sufficient starting pool of protein is available for fractionation, purification, and crystallization. Not only is the pipeline presented here applicable to different source organisms or specific tissue types, but it is also feasible on a single lab scale. The combination of native source protein purification with novel microfluidic technology enables crystallographic characterization of protein samples orders of magnitude smaller than traditional crystallographic methodologies would suggest. These results validate the “macro-to-micro” approach as a complementary method to recombinant methodologies currently employed by structural genomics initiatives.

## Methods

### Preparation of Soluble Protein Extracts from *E. coli*

A 4 L culture of *E. coli* DH5 $\alpha$  cells grown overnight in minimal media by shaking at 37°C was used to inoculate a 120 L fermentor containing minimal media. The cells were grown to log phase, harvested by continuous-flow centrifugation, washed, and frozen in liquid nitrogen. The 1 kg cell pellet was resuspended in 3 L of lysis buffer (10 mM NaCl, 25 mM Tris pH 7.0, 1 mM DTT and 0.05% Triton X-100) and lysed by two passages through an EmulsiFlex-C3 homogenizer at 10,000 psi. The cell debris was removed by centrifugation for 60 min at 15,000 rpm. A Bradford protein assay was used to determine the protein concentration

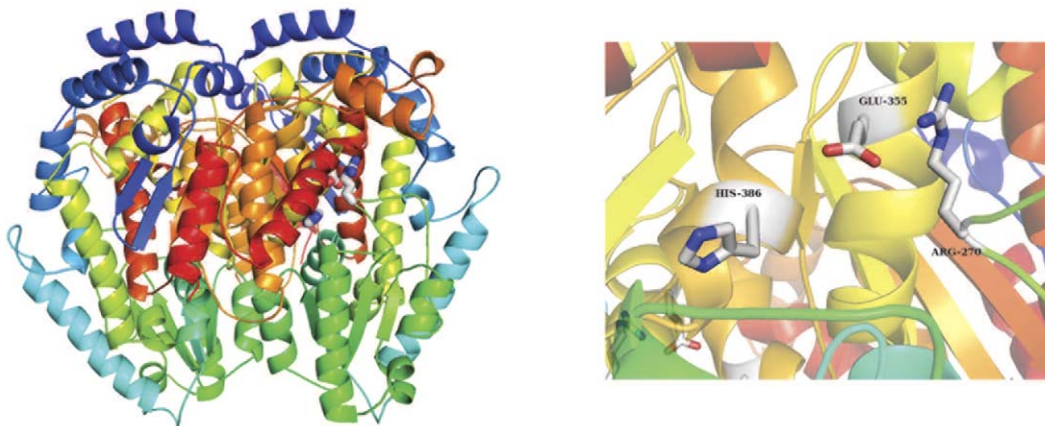

**Figure 6.** PGI dimer and putative active site. Left, the pGI dimer. Right, close-up view of the active site with putative active site residues colored by atom and labeled. The active site is formed at the dimer interface and has contributions from both monomers.  
doi:10.1371/journal.pone.0032498.g006



**Table 4.** Data collection and refinement statistics for 6-phospho-beta-glucosidase (BglA).

| BglA                               |                     |
|------------------------------------|---------------------|
| <b>Data collection</b>             |                     |
| Space group                        | P1                  |
| Cell dimensions                    |                     |
| <i>a</i> , <i>b</i> , <i>c</i> (Å) | 73.7, 79.4, 98.6    |
| $\alpha$ , $\beta$ , $\gamma$ (°)  | 100.0, 107.2, 102.8 |
| Resolution (Å)                     | 22.9–2.3 (2.42–2.3) |
| $R_{\text{sym}}$                   | 0.143(0.53)         |
| <i>I</i> / $\sigma$ <i>I</i>       | 7.9 (2.2)           |
| Completeness (%)                   | 92.7 (66.3)         |
| Redundancy                         | 4.0(3.9)            |
| <b>Refinement</b>                  |                     |
| Resolution (Å)                     | 22.9–2.3            |
| No. reflections                    | 82815               |
| $R_{\text{work}}/R_{\text{free}}$  | 23.7/17.1           |
| No. atoms                          |                     |
| Protein                            | 16976               |
| Ligand/ion                         | 19                  |
| Water                              | 1651                |
| <i>B</i> -factors                  |                     |
| Protein                            | 20.0                |
| Ligand/ion                         | 72.5                |
| Water                              | 23.78               |
| R.m.s. deviations                  |                     |
| Bond lengths (Å)                   | 0.003               |
| Bond angles (°)                    | 0.704               |

\*Values in parentheses are for highest-resolution shell.  
doi:10.1371/journal.pone.0032498.t004

using Bio-Rad Protein Assay Dye. The lysate was treated with protease inhibitors and the nucleic acids were digested using DNaseI.

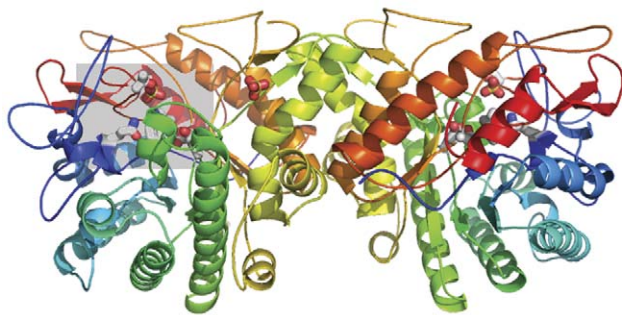

### Whole-proteome fractionation pipeline

Tangential flow filtration (TFF) using the ProFlux M12 (Millipore) with a nominal molecular weight cutoff (NMWC) of >500,000 Da was used to remove cell debris, aggregates, and large complexes from the lysate. The retentate was purified using a sequence of three purification steps: sucrose gradient→TSK-Gel G4000SW→ion exchange chromatography on an 8 ml MonoQ column (GE Healthcare Life Sciences). The permeate, at <500,000 Da, was subjected to a sequence of three or more orthogonal purification steps (affinity interactions, multiple ion exchangers, hydrophobic interaction and/or size exclusion). In a standard protocol, 50 to 500 ml of the permeate was applied to different capture resins, with column volume and permeate volume scaled according to the capacity of the capture resin. The initial separation step was performed on one of the five choices of resins. The capture columns used were CaptoQ columns (quaternary ammonium, anion exchanger resin), Capto MMC (multimodal weak cation exchanger resin), Blue Sepharose columns (triazine coupling resin), Heparin Sepharose columns (reductive amination resin) or on SP Sepharose columns (Sulfopropyl strong cation resin). The columns were eluted in 3 to 5 steps, and each subsequent step was then applied to a Phenyl sepharose column and further subdivided into 6 fractions. These fractions were then applied to a preparatory scale Superdex 200 column (GE Healthcare Life Sciences) or a polishing high resolution ionic exchange 8 ml MonoQ or MonoS column (polystyrene/divinyl benzene particles substituted with quaternary amino (Q) or methyl sulfonate groups (S)). The eluted fractions were 1 ml in volume and collected in 96 well trays. For example, YghZ was purified via heparin sepharose, phenyl sepharose, and then a polishing MonoQ step. BglA, GDH, and pGI were purified in a similar manner as YghZ, with the exception of the initial heparin column being replaced by a CaptoQ step.

The purity of the fractions was assessed by 1-D electrophoretic separation with the LabChip90 Caliper LifeSciences System. Similar fractions were pooled and concentrated using spin concentrators to 10–20 mg/ml for crystallization. Mass spectrometry was used for the identification of the fraction of samples that crystallized.

### Mass spectrometry

Mass spectrometry and tandem mass spectrometry (MS/MS) were performed using a quadrupole time-of-flight mass spectrom-

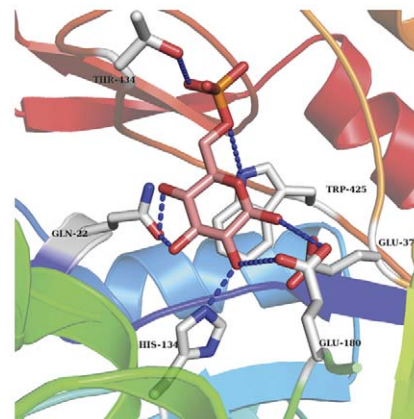

**Figure 7. BglA dimer and putative active site.** Left, BglA dimer with the putative active site outlined in a gray box. Right, close up of the active site with glucose-6-phosphate modeled based of the position of the sulfate ion from crystallization. Active site residues are depicted as ball-and-stick. Putative hydrogen bonds to the substrate are drawn as dashed lines.  
doi:10.1371/journal.pone.0032498.g007

**Table 5.** Data collection and refinement statistics for glutamate dehydrogenase (GDH).

| GDH                                                 |                                               |
|-----------------------------------------------------|-----------------------------------------------|
| <b>Data collection</b>                              |                                               |
| Space group                                         | P2 <sub>1</sub> 2 <sub>1</sub> 2 <sub>1</sub> |
| Cell dimensions                                     |                                               |
| <i>a</i> , <i>b</i> , <i>c</i> (Å)                  | 101.9 151.6 170.0                             |
| $\alpha$ , $\beta$ , $\gamma$ (°)                   | 90.0 90.0 90.0                                |
| Resolution (Å)                                      | 40.0–3.2 (3.32–3.20)                          |
| <i>R</i> <sub>sym</sub>                             | 0.164 (0.515)                                 |
| <i>I</i> / $\sigma$ <i>I</i>                        | 7.9 (2.3)                                     |
| Completeness (%)                                    | 99.8 (99.7)                                   |
| Redundancy                                          | 3.7 (3.6)                                     |
| <b>Refinement</b>                                   |                                               |
| Resolution (Å)                                      | 38–3.2                                        |
| No. reflections                                     | 43835                                         |
| <i>R</i> <sub>work</sub> / <i>R</i> <sub>free</sub> | 0.2286/0.2653                                 |
| No. atoms                                           |                                               |
| Protein                                             | 19913                                         |
| Ligand/ion                                          | 8                                             |
| Water                                               | 44                                            |
| <i>B</i> -factors                                   |                                               |
| Protein                                             | 64.6                                          |
| Ligand/ion                                          | 48.3                                          |
| Water                                               | 29.5                                          |
| R.m.s. deviations                                   |                                               |
| Bond lengths (Å)                                    | 0.001                                         |
| Bond angles (°)                                     | 0.424                                         |

doi:10.1371/journal.pone.0032498.t005

eter (Q-tof Premier, Waters, Milford, MA) that was equipped with a nanoelectrospray ionization source and connected in-line with an ultraperformance liquid chromatograph (nanoAcquity UPLC, Waters). ESI mass spectra of intact proteins were processed using

MassLynx software (version 4.1, Waters). The data resulting from UPLC-MS/MS analysis of trypsin-digested proteins were searched against the Swiss-Prot database using ProteinLynx Global Server software (Waters). Protein identifications were validated by manual inspection of the MS/MS spectra.

### Crystallization

All the fractions were screened in Topaz<sup>TM</sup> 8.96 (Fluidigm Corporation) microfluidic crystallization chips against Index and OptiMix screens at room temperature, using approximately 1  $\mu$ L of protein sample per 96-well screen. The results were viewed and analyzed by the AutoInspex<sup>®</sup> station, which records images of each experiment over a 7 day period and automatically scores each experiment. Samples yielding high-quality crystals were reproduced and optimized in Greiner 96 well sitting drop plates using the Mosquito<sup>®</sup> crystallization robot (TTP Labtech). Depending on amount of sample available, optimization conditions were chosen to sample a range of precipitant conditions, generally  $\pm$ 20% from the initial crystal hit. Lower quality crystals were improved by screening crystallization additives or further sample purification. For small sample volume and in cases where crystals from the initial screen were not reproduced by vapor diffusion, diffraction-capable microfluidic chips (Fluidigm Corp.) were screened for diffraction.

### Data Collection

Crystals grown in conventional trays were cryoprotected prior to flash freezing in liquid nitrogen by transferring to a solution containing either a higher (>30%) concentration of precipitant where possible (PEG 1000, 3500-based conditions) or 50% glycerol. Crystals grown in diffraction-capable chips were cryoprotected by cutting open liquid channels and allowing a 50% glycerol solution to diffuse into the crystallization chamber. Sections of the chips containing crystals were then excised and attached to magnetic mounting pins before freezing. Data were collected at ALS beamlines 8.3.1, 12.3.1, and 8.2.1, and SSRL beamlines 9-1 and 9-2, and processed with HKL2000 [40], XDS [41], or MOSFLM [42] and SCALA [43], using the Elves automation software [44]. All data sets were obtained from a single crystal except for the in-chip crystals of 5-keto-4-deoxyuronate.

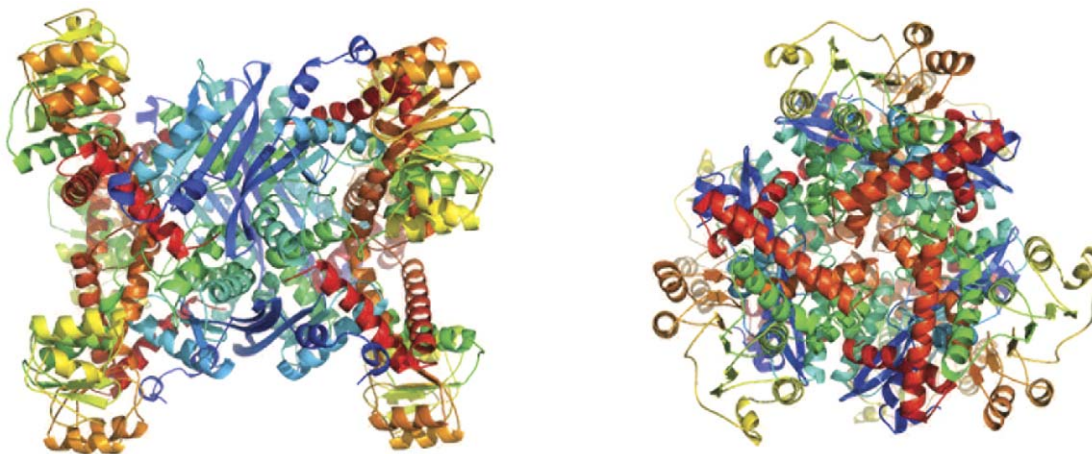

**Figure 8.** GDH hexamer from *E. coli*. The protein forms a hexamer (dimer of trimers). Left, view of the GDH hexamer along the two-fold axis. Right, view of the GDH hexamer along the three-fold axis.

doi:10.1371/journal.pone.0032498.g008

## Structure Determination and Refinement

The space group and unit cell dimensions of each crystal were used to search the *E. coli* proteins in the PDB for candidate molecules. Mass spectrometry was used to determine the identity of unknown crystallized proteins, where possible. In all other cases, brute-force molecular replacement (MR) trials were conducted using all structures in the PDB with at least 30% sequence identity to an *Escherichia coli* ORF. At the time of these experiments, there were approximately 10,000 unique structures with at least 30% sequence identity to an *E. coli* open reading frame. Decreasing the percent sequence identity to 25% yielded approximately 15,000 structures, however, no further MR solutions were found for the datasets. The program MOLREP [8] was used to calculate scores for the rotation function alone, the highest scoring functions were selected, and the candidate structures were subjected to full MR using MOLREP or PHASER [9]. In the case of YghZ, MR alone could not distinguish between several homologous ORFs, and the model was partially refined and rebuilt with ARP/wARP [45–46] to an R-free of 37%, at which point the high resolution of the data allowed identification of unique sequences in the electron density.

Structures for proteins already deposited in the PDB were not refined except to confirm the molecular replacement solutions. For the novel structures, initial models were refined using either REFMAC [43,47] or phenix.refine [48,49], and rebuilt using

ARP/wARP or phenix.autobuild [50] where the resolution was high enough. The rebuilt models were then iteratively refined with manual building in Coot [51] and refinement with phenix.refine or REFMAC. NCS restraints were applied throughout refinement until the final stages, where they were released if resolution was 2.1 Å or better. PyMOL [52] was used to generate all structure figures. Novel structures are deposited in the PDB under codes 3N6Q, 2XH Y, 3NBU, 3SBO for YghZ, BglA, pGI, and GDH, respectively. Ramachandran statistics for YghZ were 97% (favored), 2.6% (allowed), 0.4% (disallowed), for BglA 97.1% (favored), 2.8% (allowed), 0.1% (disallowed), for pGI 96% (favored), 3.8% (allowed), 0.3% (disallowed), and for GDH 86.1% (favored), 13.5% (allowed), 0.4% (disallowed).

## Acknowledgments

We thank James Holton, George Meigs and Jane Tanamachi at ALS Beamline 8.3.1 for help with X-ray data collection.

## Author Contributions

Conceived and designed the experiments: CZ TA MT NE JMB APM. Performed the experiments: MT NE MN CLG AM SG ATI APM CZ. Analyzed the data: MT NE MN CLG APM CZ TA. Contributed reagents/materials/analysis tools: SG ATI APM. Wrote the paper: MT NE CZ TA.

## References

1. Fox BG, Goulding C, Malkowski MG, Stewart L, Deacon A (2008) Structural genomics: from genes to structures with valuable materials and many questions in between. *Nat Methods* 5: 129–132.
2. Blattner FR, Plunkett G, 3rd, Bloch CA, Perna NT, Burland V, et al. (1997) The complete genome sequence of *Escherichia coli* K-12. *Science* 277: 1453–1462.
3. Riley M, Abe T, Arnaud MB, Berlyn MK, Blattner FR, et al. (2006) *Escherichia coli* K-12: a cooperatively developed annotation snapshot–2005. *Nucleic Acids Res* 34: 1–9.
4. Tartaglia GG, Pechmann S, Dobson CM, Vendruscolo M (2009) A relationship between mRNA expression levels and protein solubility in *E. coli*. *J Mol Biol* 388: 381–389.
5. Li L, Ismagilov RF (2010) Protein crystallization using microfluidic technologies based on valves, droplets, and SlipChip. *Annu Rev Biophys* 39: 139–158.
6. Hansen CL, Skordalakes E, Berger JM, Quake SR (2002) A robust and scalable microfluidic metering method that allows protein crystal growth by free interface diffusion. *Proc Natl Acad Sci U S A* 99: 16531–16536.
7. Hansen CL, Classen S, Berger JM, Quake SR (2006) A microfluidic device for kinetic optimization of protein crystallization and in situ structure determination. *J Am Chem Soc* 128: 3142–3143.
8. Vagin A, Teplyakov A (2010) Molecular replacement with MOLREP. *Acta Crystallogr D Biol Crystallogr* 66: 22–25.
9. McCoy AJ, Grosse-Kunstleve RW, Adams PD, Winn MD, Storoni LC, et al. (2007) Phaser crystallographic software. *J Appl Crystallogr* 40: 658–674.
10. Jez JM, Bennett MJ, Schlegel BP, Lewis M, Penning TM (1997) Comparative anatomy of the aldo-keto reductase superfamily. *Biochem J* 326(Pt 3): 625–636.
11. Lee WH, Lukacik P, Guo K, Ugochukwu E, Kavanagh KL, et al. (2009) Structure-activity relationships of human AKR-type oxidoreductases involved in bile acid synthesis: AKR1D1 and AKR1C4. *Mol Cell Endocrinol* 301: 199–204.
12. Grant AW, Steel G, Waugh H, Ellis EM (2003) A novel aldo-keto reductase from *Escherichia coli* can increase resistance to methylglyoxal toxicity. *FEMS Microbiol Lett* 218: 93–99.
13. Krissinel E, Henrick K (2007) Inference of macromolecular assemblies from crystalline state. *J Mol Biol* 372: 774–797.
14. Graham Solomons JT, Zimmerly EM, Burns S, Krishnamurthy N, Swan MK, et al. (2004) The crystal structure of mouse phosphoglucose isomerase at 1.6 Å resolution and its complex with glucose 6-phosphate reveals the catalytic mechanism of sugar ring opening. *J Mol Biol* 342: 847–860.
15. Davies C, Muirhead H (2002) Crystal structure of phosphoglucose isomerase from pig muscle and its complex with 5-phosphoarabinonate. *Proteins* 49: 577–579.
16. Hudson JI, Pope HG, Jr., Daniels SR, Horwitz RI (1993) Eosinophilia-myalgia syndrome or fibromyalgia with eosinophilia? *JAMA* 269: 3108–3109.
17. Sakamoto N, Kotre AM, Savageau MA (1975) Glutamate dehydrogenase from *Escherichia coli*: purification and properties. *J Bacteriol* 124: 775–783.
18. Ishihama Y, Schmidt T, Rappsilber J, Mann M, Hartl FU, et al. (2008) Protein abundance profiling of the *Escherichia coli* cytosol. *BMC Genomics* 9: 102 p.
19. Keseler IM, Collado-Vides J, Santos-Zavaleta A, Peralta-Gil M, Gama-Castro S, et al. (2011) EcoCyc: a comprehensive database of *Escherichia coli* biology. *Nucleic Acids Res* 39: D583–590.
20. Shen Y, Berger SJ, Smith RD (2001) High-efficiency capillary isoelectric focusing of protein complexes from *Escherichia coli* cytosolic extracts. *J Chromatogr A* 914: 257–264.
21. Sigdel TK, Cilliers R, Gursahany PR, Crowder MW (2004) Fractionation of soluble proteins in *Escherichia coli* using DEAE-, SP-, and phenyl sepharose chromatographies. *J Biomol Tech* 15: 199–207.
22. Ali MH, Imperiali B (2005) Protein oligomerization: how and why. *Bioorg Med Chem* 13: 5013–5020.
23. Babnigg G, Joachimiak A (2010) Predicting protein crystallization propensity from protein sequence. *J Struct Funct Genomics* 11: 71–80.
24. Taniguchi Y, Choi PJ, Li GW, Chen H, Babu M, et al. (2010) Quantifying *E. coli* proteome and transcriptome with single-molecule sensitivity in single cells. *Science* 329: 533–538.
25. Mujacic M, Bader MW, Baneyx F (2004) *Escherichia coli* Hsp31 functions as a holding chaperone that cooperates with the DnaK-DnaJ-GrpE system in the management of protein misfolding under severe stress conditions. *Mol Microbiol* 51: 849–859.
26. Jin X, Chen Y, Lubman DM, Misk D, Hanash SM (1999) Capillary electrophoresis/tandem mass spectrometry for analysis of proteins from two-dimensional sodium dodecyl sulfate polyacrylamide gel electrophoresis. *Rapid Commun Mass Spectrom* 13: 2327–2334.
27. Chen Y, Jin X, Misk D, Hinderer R, Hanash SM, et al. (1999) Identification of proteins from two-dimensional gel electrophoresis of human erythroleukemia cells using capillary high performance liquid chromatography/electrospray-ion trap-reflection time-of-flight mass spectrometry with two-dimensional topographic map analysis of in-gel tryptic digest products. *Rapid Commun Mass Spectrom* 13: 1907–1916.
28. Das DK, Baker MG, Venugopal K (2011) Increasing incidence of necrotizing fasciitis in New Zealand: A nationwide study over the period 1990 to 2006. *J Infect*.
29. Qian B, Raman S, Das R, Bradley P, McCoy AJ, et al. (2007) High-resolution structure prediction and the crystallographic phase problem. *Nature* 450: 259–264.
30. Khatib F, Dimaio F, Cooper S, Kazmierczyk M, Gilski M, et al. (2011) Crystal structure of a monomeric retroviral protease solved by protein folding game players. *Nat Struct Mol Biol* 18: 1175–1177.
31. DiMaio F, Terwilliger TC, Read RJ, Wlodawer A, Oberdorfer G, et al. (2011) Improved molecular replacement by density- and energy-guided protein structure optimization. *Nature* 473: 540–543.
32. Rodriguez DD, Grosse C, Himmel S, Gonzalez C, de Ilarduya IM, et al. (2009) Crystallographic ab initio protein structure solution below atomic resolution. *Nat Methods* 6: 651–653.
33. Das R, Baker D (2009) Prospects for de novo phasing with de novo protein models. *Acta Crystallogr D Biol Crystallogr* 65: 169–175.

34. Stokes-Rees I, Sliz P (2010) Protein structure determination by exhaustive search of Protein Data Bank derived databases. *Proc Natl Acad Sci U S A* 107: 21476–21481.
35. Jaroszewski L, Li Z, Krishna SS, Bakolitsa C, Wooley J, et al. (2009) Exploration of uncharted regions of the protein universe. *PLoS Biol* 7: e1000205.
36. Schwarzenbacher R, Godzik A, Jaroszewski L (2008) The JCSG MR pipeline: optimized alignments, multiple models and parallel searches. *Acta Crystallogr D Biol Crystallogr* 64: 133–140.
37. Long F, Vagin AA, Young P, Murshudov GN (2008) BALBES: a molecular-replacement pipeline. *Acta Crystallogr D Biol Crystallogr* 64: 125–132.
38. Nanao MH, Sheldrick GM, Ravelli RB (2005) Improving radiation-damage substructures for RIP. *Acta Crystallogr D Biol Crystallogr* 61: 1227–1237.
39. Ravelli RB, Nanao MH, Lovering A, White S, McSweeney S (2005) Phasing in the presence of radiation damage. *J Synchrotron Radiat* 12: 276–284.
40. Otwinowski Z, Minor W (1997) Processing of X-ray Diffraction Data Collected in Oscillation Mode. In: Carter Jr. CW, Sweet RM, eds. *Methods in Enzymology*. pp 307–326.
41. Kabsch W (2010) Xds. *Acta Crystallogr D Biol Crystallogr* 66: 125–132.
42. Leslie AGW (1992) Recent changes to the MOSFLM package for processing and image plate data. *Joint CCP4+ESF-EAMCB Newsletter on Protein Crystallography* 26.
43. (1994) Collaborative Computational Project, Number 4. *Acta Crystallogr D Biol Crystallogr* 50: 760–763.
44. Holton J, Alber T (2004) Automated protein crystal structure determination using ELVES. *Proc Natl Acad Sci U S A* 101: 1537–1542.
45. Perrakis A, Morris R, Lamzin VS (1999) Automated protein model building combined with iterative structure refinement. *Nat Struct Biol* 6: 458–463.
46. Zwart PH, Langer GG, Lamzin VS (2004) Modelling bound ligands in protein crystal structures. *Acta Crystallogr D Biol Crystallogr* 60: 2230–2239.
47. Murshudov GN, Skubak P, Lebedev AA, Pannu NS, Steiner RA, et al. (2011) REFMAC5 for the refinement of macromolecular crystal structures. *Acta Crystallogr D Biol Crystallogr* 67: 355–367.
48. Adams PD, Afonine PV, Bunkoczi G, Chen VB, Davis IW, et al. (2010) PHENIX: a comprehensive Python-based system for macromolecular structure solution. *Acta Crystallogr D Biol Crystallogr* 66: 213–221.
49. Afonine PV, Grosse-Kunstleve RW, Adams PD (2005) CCP4 Newsletter 42. .
50. Terwilliger TC, Grosse-Kunstleve RW, Afonine PV, Moriarty NW, Zwart PH, et al. (2008) Iterative model building, structure refinement and density modification with the PHENIX AutoBuild wizard. *Acta Crystallogr D Biol Crystallogr* 64: 61–69.
51. Emsley P, Cowtan K (2004) Coot: model-building tools for molecular graphics. *Acta Crystallogr D Biol Crystallogr* 60: 2126–2132.
52. DeLano WL (2002) The PyMOL Molecular Graphics System.
